# Supplementary material for: Identification of prognostic inflammatory factors in colorectal liver metastases
Source: PubMed Central journal article supplement (PMC4125702; doi:10.1186/1471-2407-14-542), 2014-07-28
Supplement: 12885_2013_4734_MOESM1_ESM.pdf [file 12885_2013_4734_MOESM1_ESM.pdf]

**Supplementary Table 1** Mean and standard deviation of all inflammatory mediators analyzed

|                                                             | CRP < 10 |         | CRP ≥ 10 |         |
|-------------------------------------------------------------|----------|---------|----------|---------|
|                                                             | Mean     | SD      | Mean     | SD      |
| Epidermal Growth Factor (EGF)                               | 40.61    | 39.06   | 40.89    | 36.04   |
| Eotaxin                                                     | 114.49   | 91.37   | 88.25    | 43.31   |
| Fibroblast Growth Factor 2 (FGF-2)                          | 24.35    | 23.22   | 31.72    | 27.27   |
| FMS Related Tyrosin Kinase 3 Ligand (Flt-3 Ligand)          | 18.33    | 12.70   | 22.78    | 21.20   |
| Fractalkine                                                 | 68.89    | 140.69  | 49.91    | 62.52   |
| Granulocyte Colony-Stimulating Factor (G-CSF)               | 7.25     | 12.05   | 6.22     | 11.25   |
| Granulocyte Macrophage Colony-Stimulating Factor (GM-CSF)   | 19.43    | 39.13   | 32.62    | 58.87   |
| Growth Related Oncogene (GRO)                               | 457.67   | 180.97  | 540.84   | 288.51  |
| Interferon alpha 2 (IFNa2)                                  | 13.74    | 34.77   | 9.27     | 14.73   |
| Interferon gamma (IFNg)                                     | 20.32    | 47.95   | 20.64    | 20.32   |
| Interleukin 1 alpha (IL-1a)                                 | 7.90     | 24.63   | 2.35     | 7.02    |
| Interleukin 1 beta (IL-1b)                                  | 12.90    | 41.01   | 15.46    | 39.16   |
| Interleukin 1 Receptor Antagonist (IL-1ra)                  | 17.84    | 49.04   | 14.23    | 29.57   |
| Interleukin 2 (IL-2)                                        | 9.41     | 25.34   | 19.37    | 40.10   |
| Interleukin 4 (IL-4)                                        | 14.59    | 23.07   | 20.35    | 42.52   |
| Interleukin 5 (IL-5)                                        | 0.85     | 3.71    | 0.41     | 0.83    |
| Interleukin 6 (IL-6)                                        | 4.81     | 9.89    | 6.91     | 5.82    |
| Interleukin 7 (IL-7)                                        | 4.31     | 3.01    | 6.28     | 5.88    |
| Interleukin 8 (IL-8)                                        | 25.19    | 24.51   | 34.37    | 50.85   |
| Interleukin 10 (IL-10)                                      | 5.93     | 11.59   | 4.98     | 4.91    |
| Interleukin 12 (IL-12)                                      | 45.67    | 113.34  | 49.87    | 118.14  |
| Interleukin 13 (IL-13)                                      | 3.49     | 14.94   | 2.01     | 3.75    |
| Interleukin 15 (IL-15)                                      | 17.42    | 52.59   | 16.55    | 25.31   |
| Interleukin 17 (IL-17)                                      | 5.08     | 11.78   | 5.61     | 7.63    |
| Interferon Gamma-Induced Protein 10 (IP-10)                 | 94.87    | 60.22   | 111.28   | 77.61   |
| Monocyte Chemotactic Protein 1 (MCP-1)                      | 495.29   | 242.77  | 482.79   | 167.40  |
| Monocyte Chemotactic Protein 3 (MCP-3)                      | 29.66    | 59.73   | 29.81    | 37.31   |
| Macrophage Derived Chemokine (MDC)                          | 1400.66  | 689.60  | 1489.90  | 699.31  |
| Macrophage Inflammatory Protein 1 alpha (MIP-1a)            | 56.89    | 93.70   | 58.80    | 74.75   |
| Macrophage Inflammatory Protein 1 beta (MIP-1b)             | 78.74    | 165.86  | 67.70    | 79.01   |
| Platelet-Derived Growth Factor AA (PDGF-AA)                 | 3028.06  | 4316.98 | 3851.61  | 5208.67 |
| Platelet-Derived Growth Factor AB/BB (PDGF-AB/BB)           | 8348.14  | 3439.21 | 9166.27  | 3412.84 |
| Regulated and normal T cell expressed and secreted (RANTES) | 1291.78  | 614.28  | 1324.76  | 679.78  |
| CD 40 Ligand (CD40L)                                        | 4963.40  | 2707.31 | 4877.01  | 2537.04 |
| Soluble Interleukin 2 Receptor alpha (sIL-2Ra)              | 26.51    | 47.75   | 20.06    | 26.10   |
| Transforming Growth Factor alpha (TGFa)                     | 12.95    | 15.43   | 11.27    | 8.54    |
| Tumor Necrosis Factor alpha (TNFa)                          | 4.15     | 7.19    | 3.73     | 2.49    |
| Tumor Necrosis Factor beta (TNFb)                           | 11.81    | 48.62   | 3.70     | 6.69    |
| Vascular Endothelial Growth Factor (VEGF)                   | 99.27    | 134.51  | 68.13    | 62.37   |

\*all units in pg/mL
